# Supplementary material
Source: Research Square preprint supplement (doi:10.21203/rs.3.rs-9409629/v1)
Supplement: Supplementary file 1 [file 2f78408678e7886b62c8a3fd.docx]

Supplementary Information of

**FSBS and PLMF Pulses Enable High-Performance Distributed Acoustic Sensing**

Yanbo Xiao1,2,#, Zengling Ran1,2,#,*, Qingqiang Zhu1, Mengyue He1, Junhao Luo1, Yunfei Chen1, Qiaoling Chen1, Haifeng Chen1, Shujie An1,2, Yu Wang2, Wei Zhou2,Yunjiang Rao1,2

1The Key Laboratory of Optical Fiber Sensing and Communication, University of Electronic Science and Technology of China, Chengdu 611731, China

2Optical Science and Technology Ltd., China National Petroleum Corporation, Chengdu 611731, China

**Co-first Authors:** Yanbo Xiao, Zengling Ran

**Corresponding author:** ranzl@uestc.edu.cn

**This Supplementary Information consists of the following sections:**

S1. Theoretical analysis

S2. Demodulation process for the phase

**Supplementary note S1: Theoretical analysis**

***S1.1 Passive chirp suppression on the basis of FSBS***

According to Henry’s linewidth-enhancement model, the instantaneous frequency deviation can be expressed as , where represents the optical power and represents the SOA linewidth-enhancement factor1. Consequently, the SOA-modulated pulses exhibit negative chirp on the rising edge and positive chirp on the falling edge.

The pulse output by the SOA can be represented as , where represents the amplitude envelope, represents the frequency of the laser, represents the initial phase, and . The chirp spectrum of an SOA pulse is given by The term represents the central frequency of the chirp, whose magnitude does not affect the chirp range and is therefore neglected in the subsequent derivation. Because the FSBS process is dominated by guided acoustic modes, the susceptibility can be expressed as a function of frequency as, which provides a more intuitive representation of the process. Consequently, the analysis is conducted in the frequency domain.

The SOA-induced chirp on the rising edge can be derived by linearizing the logarithm of the optical power around the average power . We let . Approximating (, the chirp introduced by the SOA can be expressed as follows:

(S1)

where represents the Fourier transform function and . The FSBS-induced phase response at position is expressed as

(S2)

where and represents the optoacoustic coupling coefficient, which is related to the temperature, stress and coating. The phase induced by FSBS at a propagation length of is

(S3)

The FSBS-induced contribution to the instantaneous optical frequency is given by the time derivative of the phase

(S4)

By considering the broadband transmission properties of the optical fiber and the contribution from FSBS, the output is

(S5)

Within the acoustic band around , and the factor . As a result, and have opposite signs in the complex field, which leads to coherent cancellation of the edge-induced chirp.

***S1.2 Validation of chirp suppression using pulse self-interference***

The chirp introduced by SOA modulation can be regarded as a superposition of multiple linear chirps. For simplicity, it is represented as a linear chirp pulse , where A represents the pulse amplitude, represents the optical carrier frequency, and represents the chirp coefficient. After passing through an unbalanced interferometer with a delay , the detected intensity becomes . When the pulse contains chirp (), the term induces a time-varying fringe phase, which results in intensity fluctuations within the interference window. After FSBS-based suppression, decreases, and becomes constant, which corresponds to a stable self-interference intensity curve. In our experimental setup, the SOA generates 50 ns optical pulses with a rising edge of 8 ns. The difference in path length between the two fiber arms is 2 m, which corresponds to a time delay of .

**Supplementary note S2: Demodulation process for the phase**

***S2.1 Strain resolution,*** ***ultralow-frequency response, and sensing range***

After coherent signal acquisition, the detailed data processing process is as follows:

P1: The signal of each frequency component is separated by a bandpass filter.

P2: Because there are time delay signals between the different frequency components in one period, this time delay needs to be compensated for in the calculation process. After bandpass filtering and time delay compensation, the signal of the i-th frequency component is as follows:

(S6)

P3: The Hilbert transform or I/Q transform is performed on the signals of each frequency component to convert each real signal into a complex signal:

(S7)

where represents the real component and represents the imaginary component.

P4: A vector rotation operation is performed on the complex signals:

(S7)

P5: Multiple components in a multifrequency pulse period are synthesized:

(S9)

where n represents the number of pulses in the multifrequency pulse period.

P6: Furthermore, according to , the phase distribution of the multifrequency pulse period along the fiber is calculated.

***S2.2 Spatial resolution***

To improve the bandwidth of the detection pulse, 60 pulses are used in one period. According to the experimental scheme in the main text, the coherent process for incident pulse signals and backscattered signals with local oscillator light can be completed in the process of one acquisition. The detailed data processing process is as follows:

P1: The 60 pulses in a multifrequency pulse period are divided into 6 subgroups, as shown in Fig. 5a.

P2: For subgroups of backscattered signals, matched filtering is applied to each subgroup of backscattered light.

P3: Then, the signal obtained by matching filtering in P2 can be calculated as described in S2.1.
